# Supplementary material
Source: Springer Nature journal article supplement (https://www.springermedizin.de/resource/supplementary/12959_2013_197_MOESM1_ESM.pdf/9569250)

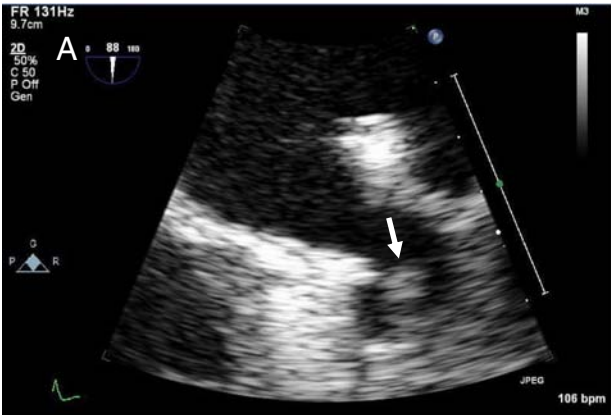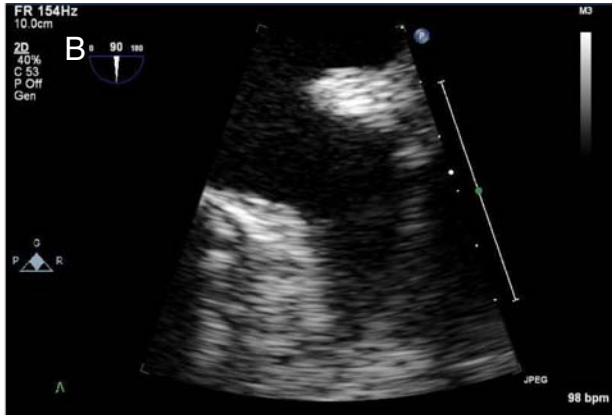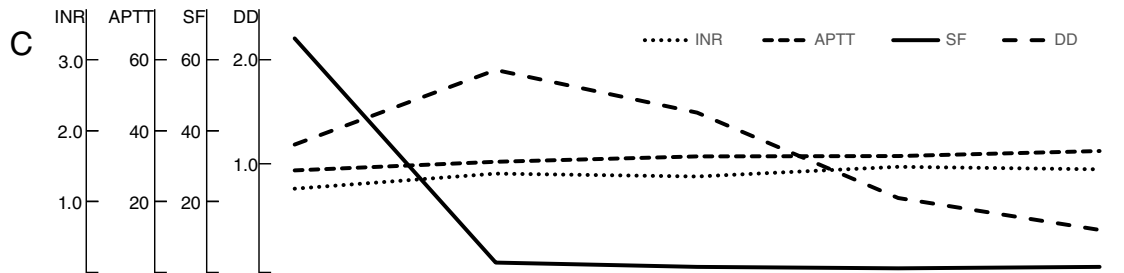

| Day     | admission | 6    | 9    | 12   | 18   |
|---------|-----------|------|------|------|------|
| INR     | 1.18      | 1.39 | 1.35 | 1.49 | 1.45 |
| PT      | 12.7      | 14.8 | 14.4 | 15.9 | 15.5 |
| APTT    | 28.7      | 31.2 | 32.7 | 32.8 | 34.2 |
| SF      | 65.9      | 2.8  | 1.6  | 1.2  | 1.6  |
| D-dimer | 1.2       | 1.9  | 1.5  | 0.7  | 0.4  |

Supplement: MOESM1 [file 9569250]
